# Supplementary material for: Photosensitive polystyrene/silver bromide hybrid colloidal crystals as recoverable colorimetric naked eye probes for bromine gas sensing
Source: Royal Society of Chemistry journal article supplement (doi:10.1039/c5tc02616d), 2015-12-10
Supplement: c5tc02616d1.pdf [file c5tc02616d1.pdf]

## Photosensitive polystyrene/silver bromide hybrid colloidal crystals as recoverable colorimetric naked eye probes for bromine gas sensing

Bing Yu, Feng Zhai, Hailin Cong and Di Yang

Electronic Supplementary Information (ESI) for Journal of Materials Chemistry C

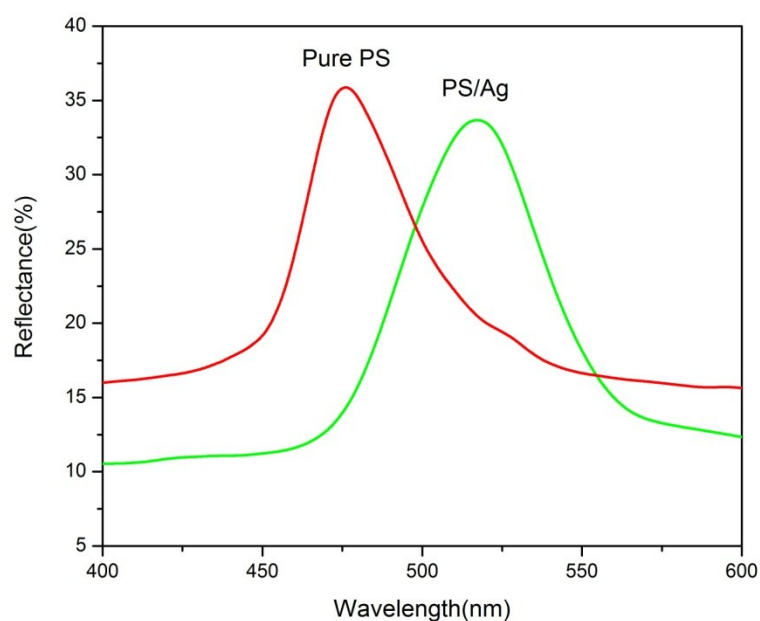

Fig. S1. Reflection spectra of pure PS and PS/Ag-NPs colloidal crystals.

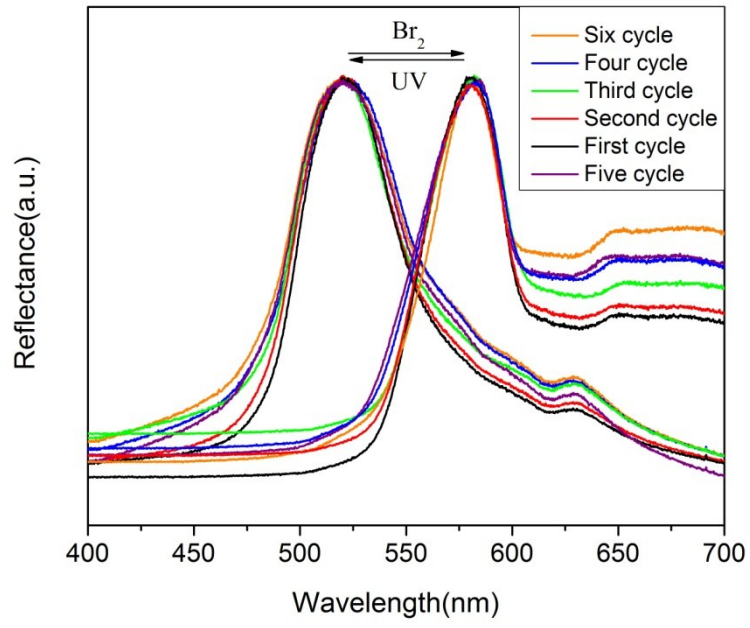

Fig. S2. Reflection spectra of six cycles for bromine gas sensing and regeneration process.
